# Supplementary material
Source: PubMed Central journal article supplement (PMC6075686)
Supplement: NIHMS941680-supplement-supplement_1.pdf [file NIHMS941680-supplement-supplement_1.pdf]

649  
650  
651  
652  
653  
654  
655  
656  
657  
658  
659  
660  
661  
662  
663  
664  
665  
666  
667  
668  
669

## Use of Bayesian Modeling to Assess Occurrence of Viral Pathogens in Multiple US Drinking Water Systems

### SUPPORTING INFORMATION

Eunice A. Varughese<sup>\*†</sup>, Nichole E. Brinkman<sup>†</sup>, Emily M. Anneken<sup>†</sup>, Jennifer L. Cashdollar<sup>†</sup>, G. Shay Fout<sup>†</sup>, Edward T. Furlong<sup>‡</sup>, Dana W. Kolpin<sup>§</sup>, Susan T. Glassmeyer<sup>†</sup>, Scott P. Keely<sup>†</sup>

<sup>†</sup>USEPA, Office of Research and Development, National Exposure Research Laboratory, 26 W. Martin Luther King Dr., Cincinnati, OH 45268, United States; varughese.eunice@epa.gov; brinkman.nichole@epa.gov; anneken.emily@epa.gov; cashdollar.jennifer@epa.gov; fout.shay@epa.gov; glassmeyer.susan@epa.gov; keely.scott@epa.gov

<sup>‡</sup>USGS, National Water Quality Laboratory, Denver Federal Center, Bldg 95 Denver, CO 80225, United States; efurlong@usgs.gov

<sup>§</sup> USGS, 400 S. Clinton St, Rm 269 Federal Building Iowa City, IA 52240, United States; dwkolpin@usgs.gov

\* Corresponding author:

Email: varughese.eunice@epa.gov; Phone: (513) 569-7628; Fax: (513) 569-7117

670 **Supplementary Methods:**

671 **Comparison of nucleic acid extraction techniques**

672 After organic flocculate concentration, EPA Method 1615 uses a tertiary concentration step, followed by  
673 small volume nucleic acid extraction (0.2 ml) to isolate viral nucleic acid. In lieu of this two-step method,  
674 a one-step method of large volume nucleic extraction (0.5 ml) has been used by our lab previously to  
675 further concentrate the sample and extract viral nucleic acid (Brinkman et al., 2013). In this study, the  
676 two-step and one-step method were compared to determine which method produced better viral  
677 recovery.

678 The two-step method involved Vivaspin concentration followed by mini-extraction, where only 1 ml of  
679 organic flocculation concentrate is used to produce approximately 200  $\mu$ L of concentrated nucleic acid.  
680 Briefly, Vivaspin 20 centrifugal concentrators (Sartorius-Stedim) with a 30K MWCO (Molecular Weight  
681 Cut Off) were pre-soaked overnight with 1 $\times$  Dulbecco's PBS, 0.2% BSA (USB) to bind non-specific sites  
682 inside the Vivaspin concentrator. After removal of the solution, 10 ml of prepared blank organic  
683 flocculate was seeded with primary effluent concentrate as a source of virus. Primary effluent is  
684 wastewater that has been settled to remove the majority of suspended and floating solids. We further  
685 concentrated the primary effluent in the laboratory as described in previous work (Brinkman et al.,  
686 2013), and measured the concentrate for levels of the multiple virus types used in this study. The  
687 primary effluent was found to contain all 5 virus types (assessed by qPCR, data not shown) that were  
688 analyzed in this study. For each method, at least 3 replicates of 9 ml of sterile organic flocculate  
689 concentrates were seeded with 0.675 ml of primary effluent concentrate. The seeded organic flocculate  
690 was added to the Vivaspin and centrifuged at 5000  $\times$  g until the retained sample volume was about 0.5  
691 ml. Afterwards, each Vivaspin was washed twice by adding 1 ml of 1 $\times$ Dulbecco's PBS, followed by  
692 centrifugation at 5000  $\times$  g until the retained volume was less than 0.4 ml. The retained sample volume

693 was brought up to 0.4 ml with 1× Dulbecco's PBS, pH 7.0, of which 200 µl of this concentrate was  
694 extracted using the QIAamp DNA Blood Mini Kit (Qiagen). Nucleic acids were eluted twice with 50 µl of  
695 buffer AE and extracts were stored at -70°C, until processed by qPCR, as detailed below.

696 The one step method involved extraction of 10 ml of the organic flocculate seeded with primary effluent  
697 concentrate, using only the QIAamp DNA Blood Maxi Extraction Kit (Qiagen), with slight modifications to  
698 manufacturer's instructions. The lysis buffer provided in the kit was replaced with Buffer AVL (Qiagen),  
699 as it is a better buffer for viral lysis. Additionally, carrier RNA (Qiagen) was supplemented at 275 µg per  
700 extraction event to buffer against loss of targeted nucleic acids and the protease digestion step was  
701 omitted. Finally, during elution of nucleic acids from the maxi column, 1 ml Buffer AE was  
702 supplemented with 400 units of Recombinant RNasin Ribonuclease Inhibitor (Promega) and the volume  
703 of the eluate was reloaded onto the column for a second elution, for a total extract volume of 1 ml.  
704 Extracts were stored at -70°C, until processed by qPCR, as detailed below. The products of the two-step  
705 and one-step extraction samples were analyzed by (RT)-qPCR as described in the manuscript.

## 706 **Whole Genome Amplification**

707 Whole genome amplification (WGA) was performed to identify samples that may be positive, but were  
708 below the limit of qPCR quantification. The samples that were determined to be negative for AdV  
709 and/or PyV DNA by qPCR, were subjected to WGA, using the Illustra Genome Phi V2 Amplification Kit  
710 (GE Healthcare). In a microcentrifuge tube, 3 µl of sample extracts was gently mixed with 7 µl of sample  
711 buffer provided with the kit, followed by heating to 95°C for 3 min. The samples were then incubated  
712 on ice for at least 10 min. To each tube, 10 µl of a mixture containing 9 parts reaction buffer and 1-part  
713 enzyme mix provided with the kit was added, gently mixed, and put back on ice. Tubes were then  
714 incubated at 30°C overnight (approximately 18 h) in a water bath. Finally, inactivation of the  
715 polymerase was done by heating the tube to 65°C for 10 min, then cooling to 4°C. Samples were stored

716 at -80°C. To assess the results of WGA, qPCR was performed on the products in 25 µl reactions, as  
717 specified in the Methods section titled, RT-qPCR/qPCR for enteric viruses, except that 2 µl of WGA  
718 product was added to each reaction.

719

## 720 **Supplementary Results:**

### 721 **Improving virus recovery efficiency**

722 Reducing the number of steps in sample processing and increasing the total volume of concentrated  
723 sample used in extraction has the potential to improve viral recovery efficiency. It was previously shown  
724 that celite concentration followed by a large volume (10 ml) extraction procedure, which provides a 10-  
725 fold concentration of the sample in addition to nucleic acid extraction, resulted in an increase of 1.4-4.3-  
726 fold in recovery efficiency for AdV, EV, and NoV compared to the two-step process of using Vivaspin  
727 tertiary concentration and small volume (0.2 ml) extraction procedure (Brinkman et al., 2013).  
728 Therefore, the large volume (1 ml) extraction procedure was examined with organic flocculation  
729 concentrates seeded with primary effluent to determine if the same increase in viral recovery efficiency  
730 was observed in organic flocculation concentrates as in celite concentrates. The use of the large volume  
731 extraction procedure allowed for a statistically significant increase in percent recovery for this step, for  
732 all 5 virus groups examined (Supplemental Fig. A1) ( $p < 0.05$ ; two-way ANOVA) with a mean increase of  
733 2.1-fold relative to the two-step process of tertiary concentration and small volume extraction. Hence, a  
734 method that deviated slightly from EPA Method 1615 was used for all DWTP samples in this study,  
735 where the large volume nucleic acid extraction replaced tertiary concentration and small volume  
736 extraction procedures.

### 737 **Whole Genome Amplification reveals false negatives by qPCR**

738 As shown in Table 2, source and treated water samples were tested for DNA (AdV and PyV) and RNA  
739 viruses (NoV GI, NoV GII, and EV) with qPCR and RT-qPCR assays, respectively. As predicted by IT  
740 analysis (Table 3), the potential for false negatives was greater in undiluted samples. Whole genome  
741 amplification (WGA) has been used to increase target DNA/RNA concentrations prior to downstream  
742 molecular techniques (e.g., deep sequencing) and might be efficacious for the detection of virus in

743 environmental samples. Therefore, WGA was carried out for all samples that were negative in the initial  
744 qPCR reactions. For RNA viruses, WGA was not successful after an independent reverse transcriptase  
745 step, despite many repeated attempts. We hypothesize this may be due to the sensitivity of reverse  
746 transcriptase to inhibitory substances in the water samples that prevented production of cDNA in the  
747 samples prior to exponential amplification. Of the samples we analyzed, we found 6 samples that were  
748 previously negative by qPCR, to be positive by WGA (Supplemental Table A3). Of these 6 samples, 4  
749 were source water samples and 1 was a treated water sample. These data suggest that there are low  
750 quantities of AdV and PyV genomic DNA in the water concentrates, at or below the limit of detection for  
751 qPCR. WGA, therefore, offers the potential of detecting virus that may be in the samples, but below  
752 detection levels using qPCR, thus improving sensitivity. Moreover, these results emphasize the need to  
753 model the rate of false negatives to accurately determine viral levels from environmental concentrates.

754 **Table A1:** Primers and probes used for (RT)-qPCR.

| Virus target                      | Primers/probes       | Sequence                           | Reference                     |
|-----------------------------------|----------------------|------------------------------------|-------------------------------|
|                                   |                      | 5' to 3'<br>Probe: 6FAM - TAMRA    |                               |
| Enterovirus                       | Forward primer       | CCC TGA ATG CGG CTA AT             | Brinkman et al.,<br>2013      |
|                                   | Reverse primer       | TGT CAC CAT AAG CAG CCA            |                               |
|                                   | Probe                | ACG GAC ACC CAA AGT AGT CGG TTC    |                               |
| Norovirus GI                      | Forward primer       | CGC TGG ATG CGN TTC CAT            | Butot et al., 2010            |
|                                   | Reverse primer       | CCT TAG ACG CCA TCA TCA TTT AC     |                               |
|                                   | Probe                | TGG ACA GGA GAY CGC RAT CT         |                               |
| Norovirus GII                     | Forward primer       | ATG TTC AGR TGG ATG AGR TTC TCW GA | Butot et al., 2010            |
|                                   | Reverse primer       | TCG ACG CCA TCT TCA TTC ACA        |                               |
|                                   | Probe                | AGC ACG TGG GAG GGC GAT CG         |                               |
| Adenovirus                        | Forward primer       | GGA CGC CTC GGA GTA CCT GAG        | Jothikumar et al.,<br>2005    |
|                                   | Reverse primer       | ACI GTG GGG TTT CTG AAC TTG TT     |                               |
|                                   | Probe (MGM quencher) | CTG GTG CAG TTC GCC CGT GCC A      |                               |
| Human polyomavirus                | Forward primer       | AGT CTT TAG GGT CTT CTA CCT TT     | McQuaig et al.,<br>2006; 2009 |
|                                   | Reverse primer       | GGT GCC AAC CTA TGG AAC AG         |                               |
|                                   | Probe                | TCA TCA CTG GCA AAC AT             |                               |
| Hepatitis G – EAC Inhibition Test | Forward primer       | CGG CCA AAA GGT GGT GGA TG         | Schlueter et al.,<br>1996     |
|                                   | Reverse primer       | CGA CGA GCC TGA CGT CGG G          |                               |
|                                   | Probe                | AGG TCC CTC TGG CGC TTG TGG CGA G  |                               |

Mixed bases in degenerate primers and probes: Y = C/T; R = A/G; W = A/T; I = deoxyinosine; N = any

755

756

757 **Table A2:** Symbols used for math equations and BUGS code

| Symbol in Materials and Methods                                     | Symbol or Value in BUGS Code                                        | Occurrence in Equation Number | Description of Symbol                                                                                                                         |
|---------------------------------------------------------------------|---------------------------------------------------------------------|-------------------------------|-----------------------------------------------------------------------------------------------------------------------------------------------|
| $\lambda_i$                                                         | $u_i$                                                               | 1,2,3,4,13,15                 | The average concentration of virus genome molecules per ml of sample; indexed with $i$                                                        |
| $\mu$                                                               | mu                                                                  | 1                             | A parameter of the lognormal distribution of enteric virus                                                                                    |
| $\tau$                                                              | tau                                                                 | 1                             | A parameter of the lognormal distribution of enteric virus                                                                                    |
| $p^{(EAC(s)+)ij}$<br>$p^{(EAC(c)+)ij}$<br>$p^{(virus+)ij}$          | ps <sub>ij</sub><br>pc <sub>ij</sub><br>p <sub>ij</sub>             | 4,5,6,7                       | The Poisson probabilities for undiluted and diluted EAC spike; EAC control; and enteric viruses; all indexed with $ij$                        |
| x-EAC <sub>(s)ij</sub><br>x-EAC <sub>(c)ij</sub><br>x <sub>ij</sub> | pcr_s <sub>ij</sub> ,<br>pcr_c <sub>ij</sub> ,<br>pcr <sub>ij</sub> | 5,7                           | The PCR count data for undiluted and diluted EAC spike; EAC control; and enteric viruses; all indexed with $ij$                               |
| $n_{ij}$                                                            | $n_{ij}$                                                            | 5,7                           | the number of PCR replicates per dilution; indexed with $ij$                                                                                  |
| $d_j$                                                               | $d_j$                                                               | 3,4,6                         | the number of PCR dilutions for enteric virus or EAC control and spike; indexed with $j$                                                      |
| $v$                                                                 | v                                                                   | 3,4,6                         | Volume of sample added to each PCR reaction in mL; a constant v for enteric virus PCR was 0.005 and for EAC (control and spike) it was 0.0045 |
| $f$                                                                 | f                                                                   | 13,15                         | The total volume (3 ml) of the nucleic acid extract that could be derived from 30 ml of organic flocculate                                    |
| $\varepsilon_i$                                                     | error <sub>i</sub>                                                  | 8,13                          | PCR error; indexed by $i$                                                                                                                     |
| $\lambda_{ci}$                                                      | uc <sub>i</sub>                                                     | 6,8                           | The average concentration of control EAC genomes per PCR reaction; indexed with $i$                                                           |
| $\lambda_{si}$                                                      | us <sub>i</sub>                                                     | 6,8                           | The average concentration of spiked EAC genomes per PCR reaction; indexed with $i$                                                            |
| $\omega_i$                                                          | loss <sub>i</sub>                                                   | 9,13,15                       | The beta distribution of virus loss due to method interference; indexed with $i$                                                              |
| $\alpha$                                                            | a                                                                   | 9,10,11,12                    | Shape parameter of the beta distribution; Estimated from eq. 11                                                                               |
| $\beta$                                                             | b                                                                   | 9,10,11,12                    | Shape parameter of the beta distribution; Estimated from eq. 12                                                                               |
| $c$                                                                 | Calculated from Adenovirus spike                                    | 10,11,12                      | Mean percentage of virus loss                                                                                                                 |
| $\sigma^2$                                                          | Calculated from Adenovirus spike                                    | 10                            | Variance of virus loss                                                                                                                        |



|                    |                      |            |                                                                                                                                                                       |
|--------------------|----------------------|------------|-----------------------------------------------------------------------------------------------------------------------------------------------------------------------|
| $\frac{vg_i}{L_i}$ | u_liter <sub>i</sub> | 13,15      | Posterior mean of virus concentration per Liter ( <i>L</i> ) of water; used for Model 1 and Model 2; indexed with <i>i</i>                                            |
| $\theta_i$         | re <sub>i</sub>      | 14,15      | The beta distribution of PCR inhibition using control and spike EAC; indexed with <i>i</i>                                                                            |
| $\alpha_1$         | a1                   | 9,10,11,12 | Shape parameter of the beta distribution; the first and second values were used for PCR-negative source and treated samples, respectively                             |
| $\beta_1$          | b1                   | 9,10,11,12 | Shape parameter of the beta distribution; Estimated by using eq. 12; the first and second values were used for PCR-negative source and treated samples, respectively. |

758

759

760 **Table A3.** Water concentrates positive for AdV and PyV using Whole Genome Amplification (WGA). All  
761 samples processed for WGA were PCR negative for AdV & PyV virus in the initial screening.

| Water Source                | DNA Virus |     |
|-----------------------------|-----------|-----|
|                             | AdV       | PyV |
| <b><u>Source Water</u></b>  |           |     |
| DWTP 11                     |           | +   |
| DWTP 24                     |           | +   |
| DWTP 26                     | +         |     |
| DWTP 27                     | +         | +   |
| <b><u>Treated Water</u></b> |           |     |
| DWTP 20                     |           | +   |

762

763

764 **Table A4.** Deviance Information for Model 1 and Model 2

| Model Number, Source (S) or Treated(T) DWTP samples <sup>#</sup> | Deviance Information* |       |       |       |
|------------------------------------------------------------------|-----------------------|-------|-------|-------|
|                                                                  | Dbar                  | Dhat  | DIC   | pD    |
| A) <u>Sensitivity analysis</u>                                   |                       |       |       |       |
| Model 1: ST PCR positive data ( $\mu=-2.6$ )                     | 467.7                 | 440.6 | 494.7 | 27.02 |
| Model 1: ST PCR positive data ( $\mu=-0.26$ )                    | 467.7                 | 440.7 | 494.7 | 27.01 |
| Model 1: ST PCR positive data ( $\mu=-0.026$ )                   | 467.7                 | 440.7 | 494.7 | 27.01 |
| B) <u>Model Comparisons</u>                                      |                       |       |       |       |
| Model 1: S, PCR positive data                                    | 419.1                 | 397.8 | 440.5 | 21.32 |
| Model 2: S, PCR positive data                                    | 419.7                 | 397.7 | 441.7 | 21.96 |

765 #  $\mu$  is from Equation 1. Source (S) or Treated (T) DWTP samples.

766 \*Dbar, Dhat, DIC and pD indicate how well the models fits the data. DBar is the posterior mean of the  
 767 deviance, Dhat is a point estimate of the deviance, DIC is the Deviance Information Criterion, and pD is a  
 768 measure of model complexity.

769

770

771 **Figure A1.** Comparison of one-step maxi extraction with two-step vivaspin and maxi-extraction of 5  
772 different virus types. Graph shows differences in percent recovery of nucleic acid from each type of  
773 method among the 5 virus types. AdV = adenovirus; EV= enterovirus; NoV GI = norovirus GI; NoV GII =  
774 norovirus GII; PyV = polyomavirus. Bars represent standard error of 3 replicate samples. ( $p < 0.05$ ; two-  
775 way ANOVA)

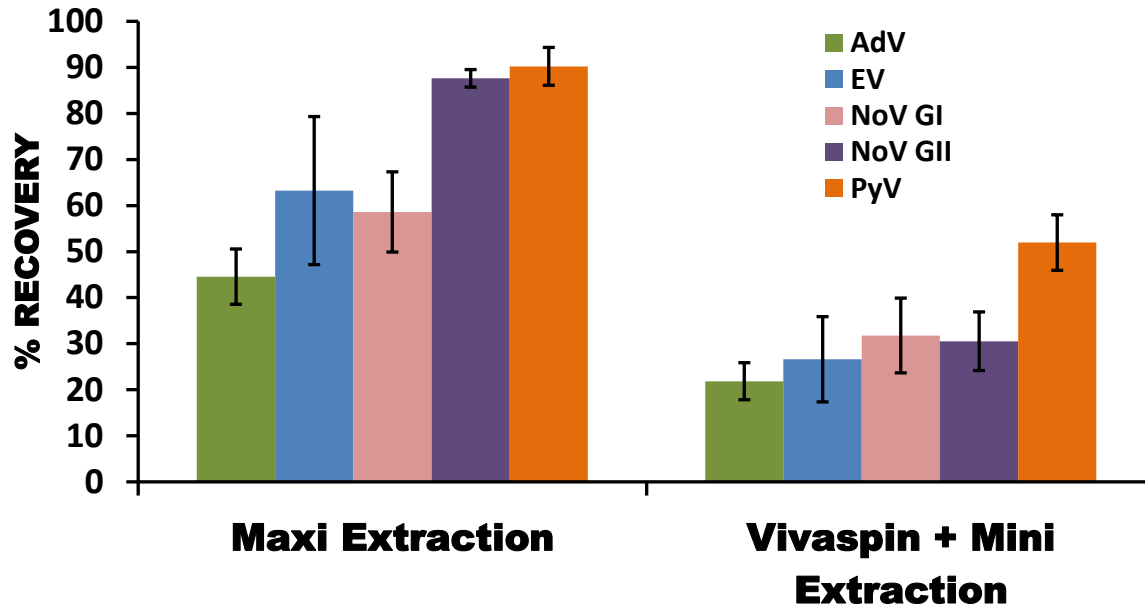

776

777

778 **Figure A2.** Bayesian credible interval plots of EAC (exogenous amplification control) spiked in samples from various DWTPs. Numbers represent  
779 DWTP identification. S and T suffixes represent source and treated water samples, respectively. Bars represent 95% credible intervals.

780

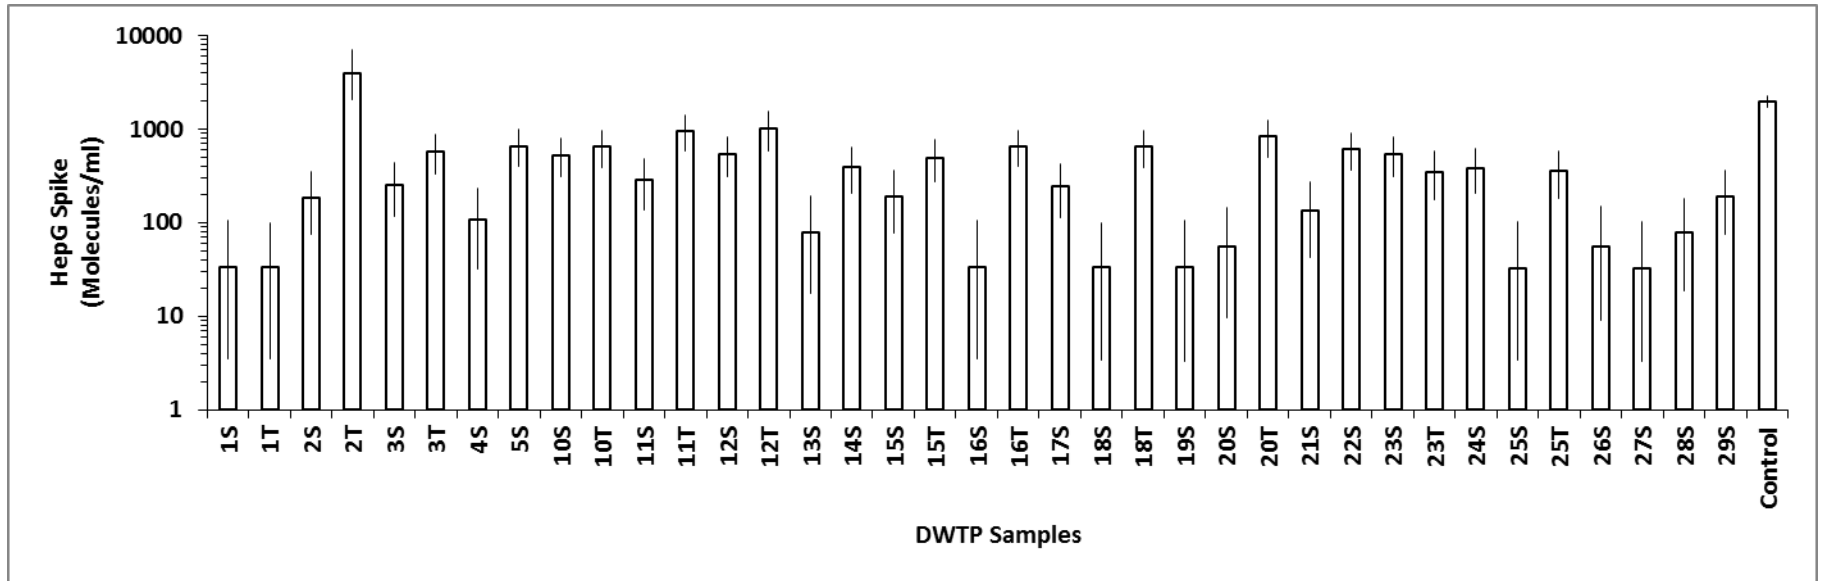

781

782 **Figure A3.** Comparison of the Brooks-Gelman-Rubin (BGR) statistic for 5 different virus types in DWTP  
783 3S. AdV = adenovirus; EV= enterovirus; NoV GI = norovirus GI; NoV GII = norovirus GII; PyV =  
784 polyomavirus. The BGR ratio was determined for the  $\frac{vg_i}{L_i}$  parameter in Equation 13.

785

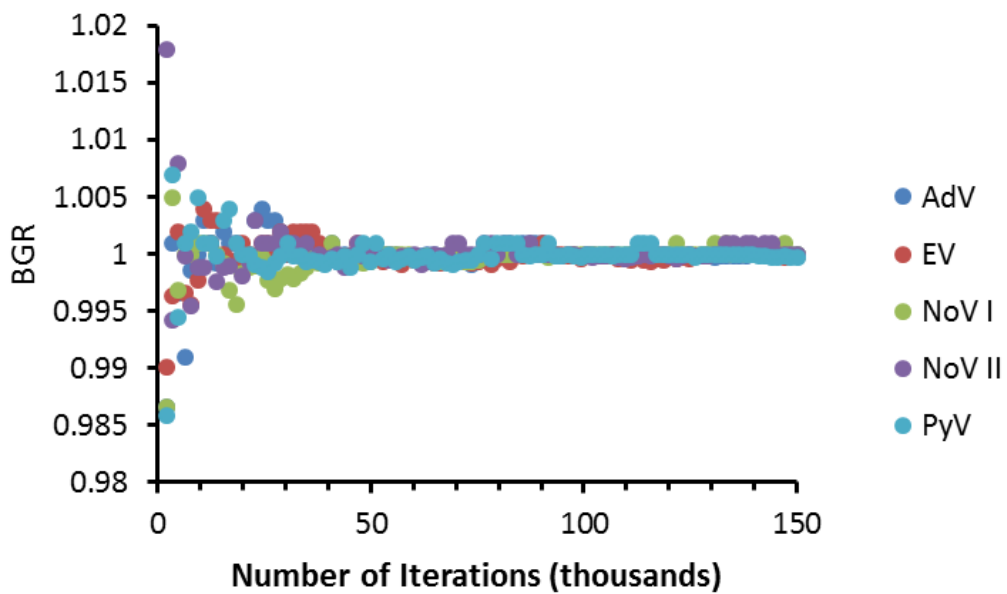

786

787
